# Supplementary material for: Predominance of Distinct Listeria Innocua and Listeria Monocytogenes in Recurrent Contamination Events at Dairy Processing Facilities
Source: PubMed Central journal article supplement (PMC7074772; doi:10.3390/microorganisms8020234), 2020-02-10
Supplement: microorganisms-08-00234-s001.pdf [file microorganisms-08-00234-s001.pdf]

**Supplement Table S1:** *L. innocua* (n=139) and *L. monocytogenes* (n=81) isolate characteristics based on multi-locus sequence typing (MLST) included in this study in comparison to the Institut Pasteur MLST isolate database.).

| Housekeeping Gene | Species                             | CC                      | ST                                  | CC                                                                                                         | Isolates (n) |
|-------------------|-------------------------------------|-------------------------|-------------------------------------|------------------------------------------------------------------------------------------------------------|--------------|
|                   |                                     | (Genetic Lineage)       | (Serogroup)                         |                                                                                                            |              |
| This Study        |                                     |                         | Mlst Database                       |                                                                                                            |              |
| <i>abcZ</i>       |                                     |                         |                                     |                                                                                                            |              |
| 3                 | <i>L. monocytogenes</i>             | 1 (I)                   | 1 (4b, 4d, 4e)                      | 1, 6, 315, 217, 218, 345, 388                                                                              | 712          |
| 4                 | <i>L. monocytogenes</i>             | 3 (I)                   | 3 (1/2b, 3b)                        | 3                                                                                                          | 330          |
| 11                | <i>L. monocytogenes</i>             | 59 (I)                  | 59 (1/2b, 3b)a                      | 59, 77, 195, 224, 426, 489, 517                                                                            | 145          |
| 5                 | <i>L. monocytogenes</i>             | 7 (II)                  | 7 (1/2a, 3a)                        | 7, 8, 26, 37, 177, 204, 229, 321,<br>380, 415, 570, 645, 739, 787, 906,<br>912, 1211                       | 643          |
| 7                 | <i>L. monocytogenes</i>             | 121, 155, 398, 403 (II) | 121*, 155*, 398, 403* (1/2a,<br>3a) | 11, 14, 18, 19, 21, 31, 33, 89, 101,<br>121, 155, 193, 207, 307, 375, 398,<br>403, 451, 475, 573, 842, 940 | 669          |
| 8                 | <i>L. monocytogenes</i>             | 14 (II)                 | 14* (1/2a, 3a)                      | 14                                                                                                         | 44           |
| 25                | <i>L. monocytogenes, L. innocua</i> | ST529 (III), ST1595     | 529 (4b, 4d, 4e), 1595*             | 132 ( <i>L. innocua</i> )                                                                                  | 7            |
| 26                | <i>L. innocua</i>                   | ST1482, ST1596          | 1482, 1596                          | 133, 602, 1482, 1596                                                                                       | 16           |
| 28                | <i>L. innocua</i>                   | 140, ST530              | 637, 530                            | 140, 537                                                                                                   | 23           |
| 36                | <i>L. innocua</i>                   | 600, ST605, ST1597      | 603*, 605, 1597*                    | 492, 600                                                                                                   | 12           |
| 40                | <i>L. innocua</i>                   | ST1600                  | 1600                                | 267 ( <i>L. monocytogenes</i> )                                                                            | 3            |
| 65                | <i>L. innocua</i>                   | 448                     | 448                                 | 448, 731                                                                                                   | 4            |
| 79                | <i>L. innocua</i>                   | ST1598                  | 1598                                | 532                                                                                                        | 9            |
| 143               | <i>L. innocua</i>                   | ST43, ST1599            | 43, 1599*                           |                                                                                                            | 2            |
| 173               | <i>L. innocua</i>                   | ST1008                  | 1008                                |                                                                                                            | 3            |
| 188               | <i>L. innocua</i>                   | ST1085                  | 1085*                               |                                                                                                            | 1            |
| 191               | <i>L. innocua</i>                   | ST1087                  | 1087                                |                                                                                                            | 1            |
| 250               | <i>L. innocua</i>                   | ST1601                  | 1601*                               |                                                                                                            | 2            |
| <i>bglA</i>       |                                     |                         |                                     |                                                                                                            |              |
| 1                 | <i>L. monocytogenes</i>             | 1, 59 (I)               | 1, 59 (4b, 4d, 4e)                  | 1, 2, 5, 54, 59, 87, 218, 240, 363,<br>373, 388, 389, 426, 554, 651                                        | 1149         |
| 4                 | <i>L. monocytogenes</i>             | 3 (I)                   | 3 (1/2b, 3b)                        | 3, 392                                                                                                     | 337          |

|     |                                     |                                                             |                                               |                                                       |     |
|-----|-------------------------------------|-------------------------------------------------------------|-----------------------------------------------|-------------------------------------------------------|-----|
| 6   | <i>L. monocytogenes</i>             | 14, 121 (II)                                                | 14*, 121* (1/2a, 3a)                          | 8, 11, 14, 18, 19, 89, 90, 121, 321,<br>375, 573, 787 | 536 |
| 7   | <i>L. monocytogenes</i>             | 403 (II)                                                    | 403* (1/2a, 3a)                               | 21, 37, 204, 403                                      | 114 |
| 8   | <i>L. monocytogenes</i>             | 7 (II)                                                      | 7 (1/2a, 3a)                                  | 7, 1211                                               | 286 |
| 10  | <i>L. monocytogenes</i>             | 155 (II)                                                    | 155* (1/2a, 3a)                               | 26, 29, 155, 177, 199, 645, 906                       | 262 |
| 13  | <i>L. monocytogenes</i>             | 398 (II)                                                    | 398 (1/2a, 3a)                                | 20, 398, 366                                          | 75  |
| 21  | <i>L. innocua</i>                   | ST43, 448, 600, ST605,<br>ST1087, ST1482,<br>ST1596, ST1598 | 43, 448, 603*, 605, 1087,<br>1482, 1596, 1598 | 133, 492, 532. 537, 600                               | 56  |
| 23  | <i>L. innocua</i>                   | 140, ST1597                                                 | 637, 1597*                                    | 140, 1086                                             | 12  |
| 62  | <i>L. innocua</i>                   | ST530, ST1600                                               | 530, 1600                                     | 448                                                   | 4   |
| 73  | <i>L. monocytogenes, L. innocua</i> | ST529 (III), ST1595                                         | 529 (4b, 4d, 4e), 1595*                       |                                                       | 2   |
| 95  | <i>L. innocua</i>                   | ST1599                                                      | 1599*                                         | 731                                                   | 5   |
| 140 | <i>L. innocua</i>                   | ST1008, ST1601                                              | 1008, 1601*                                   |                                                       | 9   |
| 157 | <i>L. innocua</i>                   | ST1085                                                      | 1085*                                         |                                                       | 1   |

*cat*

|    |                                     |                                  |                          |                                                                   |     |
|----|-------------------------------------|----------------------------------|--------------------------|-------------------------------------------------------------------|-----|
| 1  | <i>L. monocytogenes</i>             | 1 (I)                            | 1 (4b, 4d, 4e)           | 1, 217, 218, 240, 688                                             | 532 |
| 4  | <i>L. monocytogenes</i>             | 3 (I)                            | 3 (1/2b, 3b)             | 3, 87, 195, 373, 379, 517                                         | 393 |
| 5  | <i>L. monocytogenes</i>             | 7 (II)                           | 7 (1/2a, 3a)             | 7                                                                 | 285 |
| 8  | <i>L. monocytogenes</i>             | 121 (II)                         | 121* (1/2a, 3a)          | 26, 121, 229, 307, 321, 369, 412,<br>475, 570, 573, 645, 787, 842 | 260 |
| 10 | <i>L. monocytogenes</i>             | 403 (II)                         | 403* (1/2a, 3a)          | 11, 31, 124, 207, 403, 912, 940                                   | 127 |
| 12 | <i>L. monocytogenes</i>             | 59 (I)                           | 59 (1/2b, 3b)            | 4, 54, 59, 88, 224, 284, 344, 388,<br>389, 392, 489               | 212 |
| 13 | <i>L. monocytogenes, L. innocua</i> | 14 (II)                          | 14* (1/2a, 3a)           | 14, 375                                                           | 33  |
| 16 | <i>L. monocytogenes</i>             | 155 (II)                         | 155* (1/2a, 3a)          | 155                                                               | 112 |
| 19 | <i>L. monocytogenes</i>             | 398 (II)                         | 398 (1/2a, 3a)           | 19, 398                                                           | 38  |
| 30 | <i>L. innocua</i>                   | ST605, ST1597, ST1599,<br>ST1600 | 605, 1597*, 1599*, 1600  | 132, 133                                                          | 21  |
| 33 | <i>L. innocua</i>                   | 140, ST1596, ST1598              | 637, 1596, 1598          | 140, 731                                                          | 17  |
| 40 | <i>L. innocua</i>                   | ST43, 448, ST530, 600,<br>ST1482 | 43, 448, 530, 603*, 1482 | 448, 492, 600                                                     | 18  |
| 73 | <i>L. innocua</i>                   | ST1601                           | 1601*                    |                                                                   | 3   |
| 82 | <i>L. monocytogenes</i>             | ST529 (III)                      | 529 (4b, 4d, 4e)         |                                                                   | 1   |

|             |                                     |                                |                                |                                                                                              |
|-------------|-------------------------------------|--------------------------------|--------------------------------|----------------------------------------------------------------------------------------------|
| 173         | <i>L. innocua</i>                   | ST1008                         | 1008                           | 3                                                                                            |
| 182         | <i>L. innocua</i>                   | ST1085                         | 1085*                          | 1                                                                                            |
| 184         | <i>L. innocua</i>                   | ST1087                         | 1087                           | 1                                                                                            |
| 237         | <i>L. innocua</i>                   | ST1595                         | 1595*                          | 2                                                                                            |
| <b>dapE</b> |                                     |                                |                                |                                                                                              |
| 1           | <i>L. monocytogenes</i>             | 1 (I)                          | 1 (4b, 4d, 4e)                 | 1, 554, 651<br>522                                                                           |
| 3           | <i>L. monocytogenes</i>             | 3 (I)                          | 3 (1/2b, 3b)                   | 3, 4, 5, 6, 217, 315, 345, 379, 392,<br>426, 489<br>815                                      |
| 4           | <i>L. monocytogenes</i>             | 403 (II)                       | 403* (1/2a, 3a)                | 9, 204, 307, 403<br>334                                                                      |
| 6           | <i>L. monocytogenes</i>             | 14, 398 (II)                   | 14*, 398 (1/2a, 3a)            | 11, 14, 19, 20, 193, 199, 398, 412<br>275                                                    |
| 7           | <i>L. monocytogenes</i>             | 7, 155 (II)                    | 7, 155* (1/2a, 3a)             | 7, 155<br>429                                                                                |
| 8           | <i>L. monocytogenes</i>             | 121 (II)                       | 121* (1/2a, 3a)                | 90, 101, 121, 375<br>234                                                                     |
| 16          | <i>L. monocytogenes</i>             | 59 (I)                         | 59 (1/2b, 3b)                  | 59, 218, 288<br>84                                                                           |
| 33          | <i>L. innocua</i>                   | 448, ST1482, ST1596,<br>ST1600 | 448, 1482, 1596, 1600          | 133, 448, 532<br>24                                                                          |
| 35          | <i>L. innocua</i>                   | 140                            | 637                            | 140<br>11                                                                                    |
| 35          | <i>L. innocua</i>                   | ST605                          | 605                            |                                                                                              |
| 96          | <i>L. monocytogenes, L. innocua</i> | ST529 (III), ST1597,<br>ST1599 | 529 (4b, 4d, 4e), 1597*, 1599* | 3                                                                                            |
| 97          | <i>L. innocua</i>                   | ST530, ST1598                  | 530, 1598                      | 537, 1086<br>18                                                                              |
| 108         | <i>L. innocua</i>                   | 600                            | 603*                           | 5                                                                                            |
| 110         | <i>L. innocua</i>                   | ST1087                         | 1087                           | 6                                                                                            |
| 130         | <i>L. innocua</i>                   | ST1595                         | 1595*                          | 731<br>4                                                                                     |
| 167         | <i>L. innocua</i>                   | ST43                           | 43                             | 1                                                                                            |
| 208         | <i>L. innocua</i>                   | ST1008                         | 1008                           | 3                                                                                            |
| 223         | <i>L. innocua</i>                   | ST1085, ST1601                 | 1085*, 1601*                   | 2                                                                                            |
| <b>dat</b>  |                                     |                                |                                |                                                                                              |
| 1           | <i>L. monocytogenes</i>             | 398 (II)                       | 398 (1/2a, 3a)                 | 11, 19, 398, 412<br>526                                                                      |
| 2           | <i>L. monocytogenes</i>             | 3 (I)                          | 3 (1/2b, 3b)                   | 2, 3, 4, 54, 240, 284, 388, 389,<br>426<br>839                                               |
| 3           | <i>L. monocytogenes</i>             | 1, 59 (I)                      | 1, 59 (4b, 4d, 4e)             | 1, 5, 6, 59, 77, 87, 88, 195, 217,<br>344, 345, 379, 392, 489, 506, 517,<br>651, 1000<br>921 |

|     |                                     |                                                |                                             |                                                         |     |
|-----|-------------------------------------|------------------------------------------------|---------------------------------------------|---------------------------------------------------------|-----|
| 5   | <i>L. monocytogenes</i>             | 14, 155, 403 (II)                              | 14*, 155*, 403* (1/2a, 3a)                  | 8, 14, 20, 21, 89, 155, 204, 403, 739                   | 516 |
| 6   | <i>L. monocytogenes</i>             | 7, 121 (II)                                    | 7, 121* (1/2a, 3a)                          | 7, 26, 90, 121, 124, 177, 321, 380, 475, 573, 906, 1211 | 622 |
| 20  | <i>L. innocua</i>                   | ST1598                                         | 1598                                        | 132, 307, 537                                           | 22  |
| 23  | <i>L. innocua</i>                   | 140                                            | 637                                         | 140                                                     | 10  |
| 45  | <i>L. monocytogenes, L. innocua</i> | ST529 (III), 448, ST530, ST605, ST1087, ST1482 | 529 (4b, 4d, 4e), 448, 530, 605, 1087, 1482 | 448, 532, 731, 1086                                     | 32  |
| 48  | <i>L. innocua</i>                   | ST1596                                         | 1596                                        | 492                                                     | 4   |
| 55  | <i>L. innocua</i>                   | ST43, ST1595, ST1599, ST1600                   | 43, 1595*, 1599*, 1600                      | 133                                                     | 1   |
| 65  | <i>L. innocua</i>                   | 600                                            | 603*                                        | 600                                                     | 5   |
| 136 | <i>L. innocua</i>                   | ST1008, ST1085, ST1601                         | 1008, 1085*, 1601*                          |                                                         | 5   |
| 195 | <i>L. innocua</i>                   | ST1597                                         | 1597*                                       |                                                         | 2   |

*ldh*

|     |                         |                        |                                  |                                                                                                                    |      |
|-----|-------------------------|------------------------|----------------------------------|--------------------------------------------------------------------------------------------------------------------|------|
| 1   | <i>L. monocytogenes</i> | 1, 3, 59 (I)           | 1 (4b, 4d, 4e), 3, 59 (1/2b, 3b) | 1, 2, 3, 5, 6, 54, 59, 77, 87, 88, 155, 195, 218, 220, 240, 288, 363, 373, 379, 388, 389, 426, 489, 651, 688, 1000 | 1492 |
| 2   | <i>L. monocytogenes</i> | 14, 155 (II)           | 14*, 155* (1/2a, 3a)             | 7, 8, 11, 14, 26, 89, 90, 155, 207, 307, 412, 912                                                                  | 495  |
| 7   | <i>L. monocytogenes</i> | 398 (II)               | 398 (1/2a, 3a)                   | 321, 398, 573                                                                                                      | 88   |
| 19  | <i>L. innocua</i>       | ST1482, ST1595, ST1597 | 1482, 1595*, 1597*               | 532                                                                                                                | 6    |
| 24  | <i>L. monocytogenes</i> | 403 (II)               | 403* (1/2a, 3a)                  | 19, 403                                                                                                            | 24   |
| 37  | <i>L. monocytogenes</i> | 121 (II)               | 121* (1/2a, 3a)                  | 121                                                                                                                | 162  |
| 69  | <i>L. innocua</i>       | ST605                  | 605                              | 133                                                                                                                | 12   |
| 170 | <i>L. innocua</i>       | 448                    | 448                              | 448                                                                                                                | 2    |
| 180 | <i>L. innocua</i>       | ST1599                 | 1599*                            |                                                                                                                    | 2    |
| 192 | <i>L. innocua</i>       | 140                    | 637                              | 140                                                                                                                | 7    |
| 211 | <i>L. monocytogenes</i> | ST529 (III)            | 529 (4b, 4d, 4e)                 |                                                                                                                    | 1    |
| 213 | <i>L. innocua</i>       | ST1596                 | 1596                             | 140                                                                                                                |      |
| 214 | <i>L. innocua</i>       | ST530                  | 530                              |                                                                                                                    | 1    |
| 243 | <i>L. innocua</i>       | 600                    | 603*                             | 600                                                                                                                | 4    |
| 307 | <i>L. innocua</i>       | ST43                   | 43                               |                                                                                                                    | 1    |

|             |                         |                                              |                                              |                                                                                                                                                                                                   |
|-------------|-------------------------|----------------------------------------------|----------------------------------------------|---------------------------------------------------------------------------------------------------------------------------------------------------------------------------------------------------|
| 341         | <i>L. innocua</i>       | ST1008, ST1601                               | 1008, 1601*                                  | 4                                                                                                                                                                                                 |
| 353         | <i>L. innocua</i>       | ST1085                                       | 1085*                                        | 1                                                                                                                                                                                                 |
| 356         | <i>L. innocua</i>       | ST1087, ST1598, ST1600                       | 1087, 1598, 1600                             | 3                                                                                                                                                                                                 |
| 404         | <i>L. monocytogenes</i> | 7 (II)                                       | 7 (1/2a, 3a)                                 | 1211                                                                                                                                                                                              |
| <b>lhkA</b> |                         |                                              |                                              |                                                                                                                                                                                                   |
| 1           | <i>L. monocytogenes</i> | 7, 14, 121, 155, 403, 398<br>(II)            | 7*, 14*, 121*, 155*, 403*, 398<br>(1/2a, 3a) | 7, 8, 9, 11, 14, 18, 19, 20, 21, 26,<br>29, 31, 33, 89, 121, 124, 155, 177,<br>193, 199, 204, 207, 229, 262, 307,<br>380, 398, 403, 412, 451, 475, 570,<br>573, 645, 906, 912, 940, 1211,<br>1364 |
| 3           | <i>L. monocytogenes</i> | 1 (I)                                        | 1 (4b, 4d, 4e)                               | 1, 54, 217, 240, 373                                                                                                                                                                              |
| 5           | <i>L. monocytogenes</i> | 3 (I)                                        | 3 (1/2b, 3b)                                 | 2, 6, 284, 379, 389, 554                                                                                                                                                                          |
| 7           | <i>L. monocytogenes</i> | 59 (I)                                       | 59 (1/2b, 3b)                                | 5, 59                                                                                                                                                                                             |
| 16          | <i>L. innocua</i>       | ST43, 140, ST1087,<br>ST1595, ST1597, ST1599 | 43, 637, 1087, 1595*, 1597*,<br>1599*        | 132, 140                                                                                                                                                                                          |
| 17          | <i>L. innocua</i>       | ST605, ST1600                                | 605, 1600                                    | 133, 532                                                                                                                                                                                          |
| 53          | <i>L. innocua</i>       | 448, ST530, ST1482                           | 448, 530, 1482                               | 448                                                                                                                                                                                               |
| 58          | <i>L. innocua</i>       | ST1598                                       | 1598                                         |                                                                                                                                                                                                   |
| 67          | <i>L. monocytogenes</i> | ST529 (III)                                  | 529 (4b, 4d, 4e)                             |                                                                                                                                                                                                   |
| 81          | <i>L. innocua</i>       | 600                                          | 603*                                         | 600                                                                                                                                                                                               |
| 138         | <i>L. innocua</i>       | ST1008                                       | 1008                                         |                                                                                                                                                                                                   |
| 148         | <i>L. innocua</i>       | ST1085                                       | 108                                          |                                                                                                                                                                                                   |
| 214         | <i>L. innocua</i>       | ST1601                                       | 1601*                                        |                                                                                                                                                                                                   |
| 216         | <i>L. innocua</i>       | ST1596                                       | 1596                                         |                                                                                                                                                                                                   |

\**Listeria monocytogenes* and *Listeria innocua* genotypes identified as persistent in cheese producing facilities A-E. Red marked housekeeping genes are present in *L. monocytogenes* genetic lineage III and *L. innocua*. Abbreviations: CC, clonal complex.
